# Supplementary material
Source: PubMed Central journal article supplement (PMC2940986)
Supplement: NIHMS220401-supplement-6.pdf [file NIHMS220401-supplement-6.pdf]

Supplementary Fig. 4

A

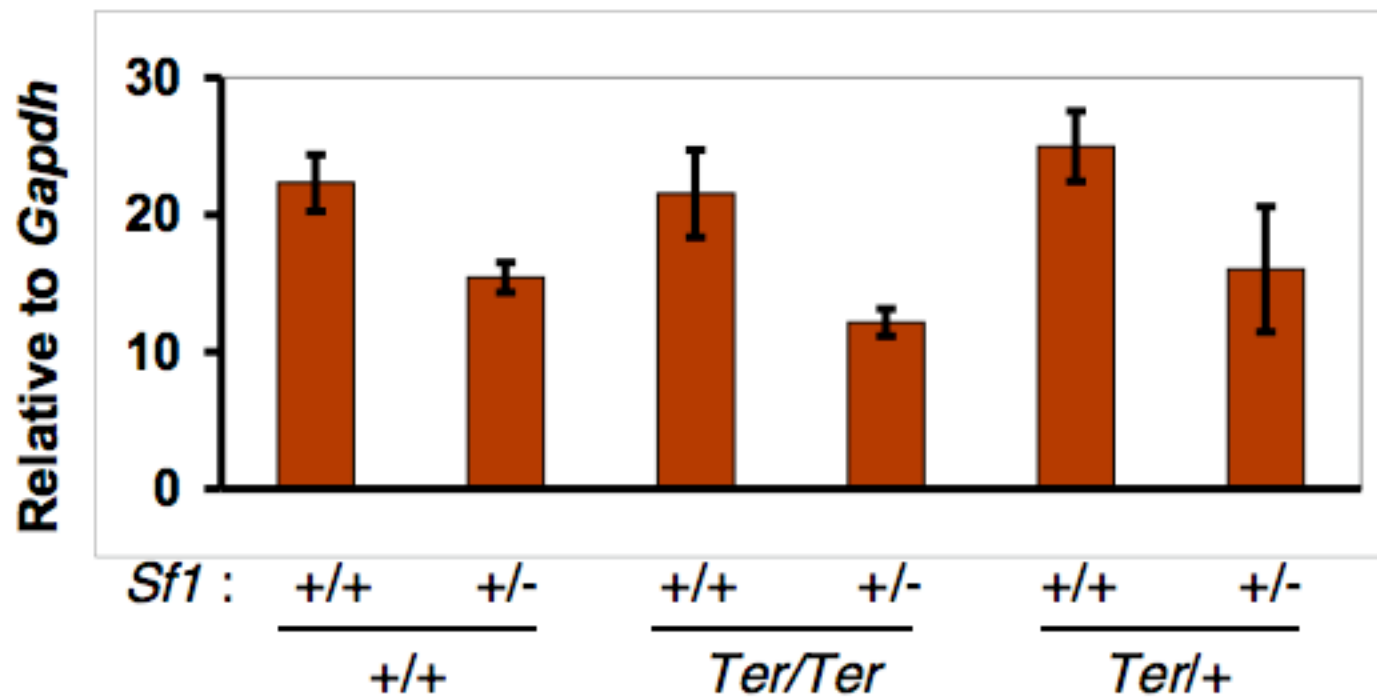

B

mouse strains

relative  
*Sf1* levels

germ cell tumor  
incidence

*Ter/Ter*

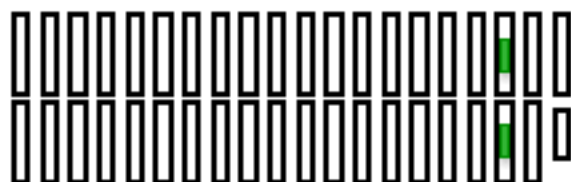

22

77 %

*Sf1*<sup>+/-</sup> ; *Ter/Ter*

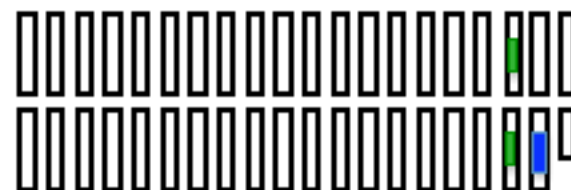

12

40 %
