# Supplementary material
Source: PubMed Central journal article supplement (PMC2940986)

Supplementary  
Fig.5

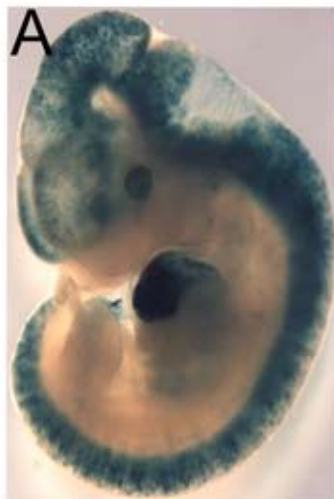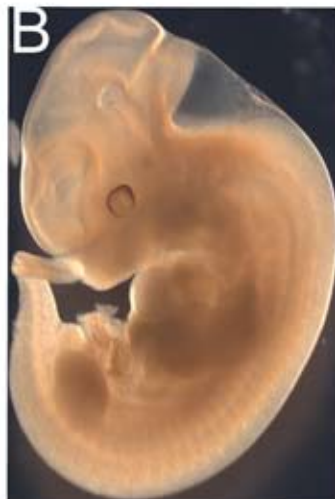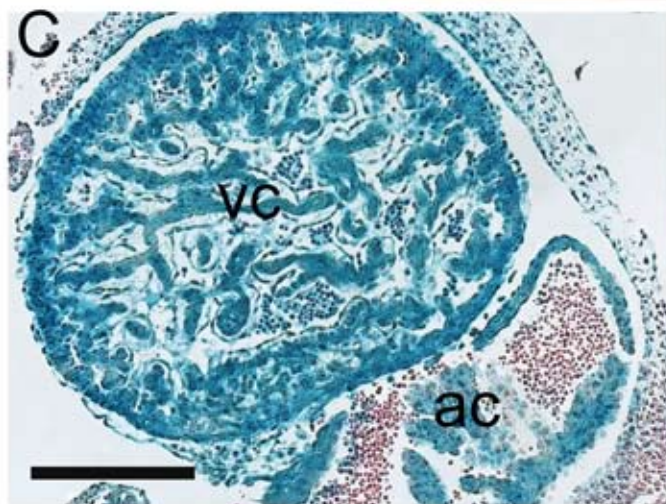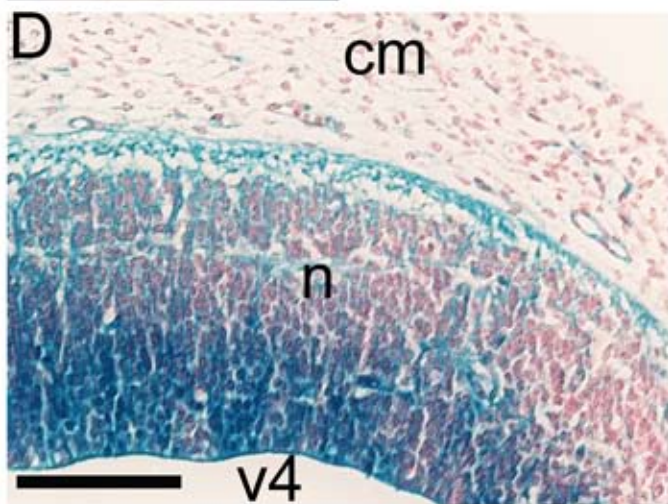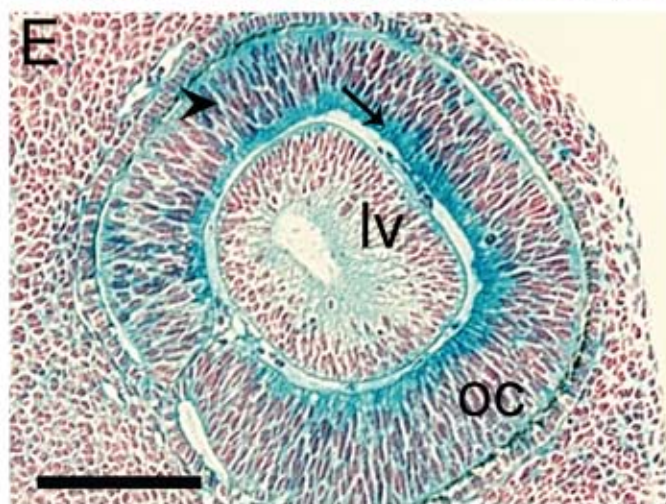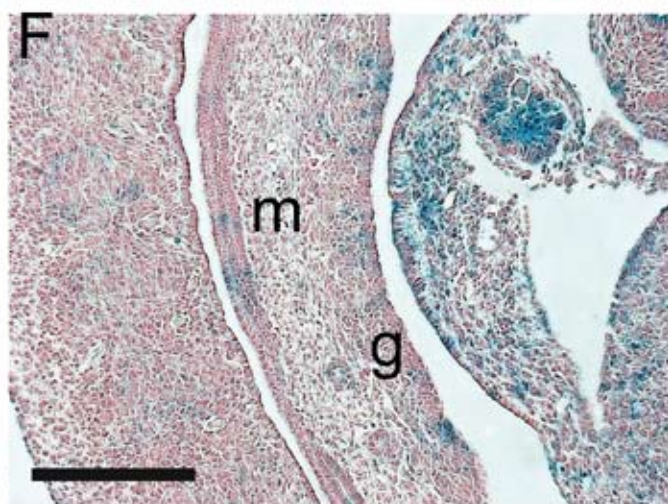

Supplement: NIHMS220401-supplement-2.pdf [file NIHMS220401-supplement-2.pdf]

Supplementary Fig 1

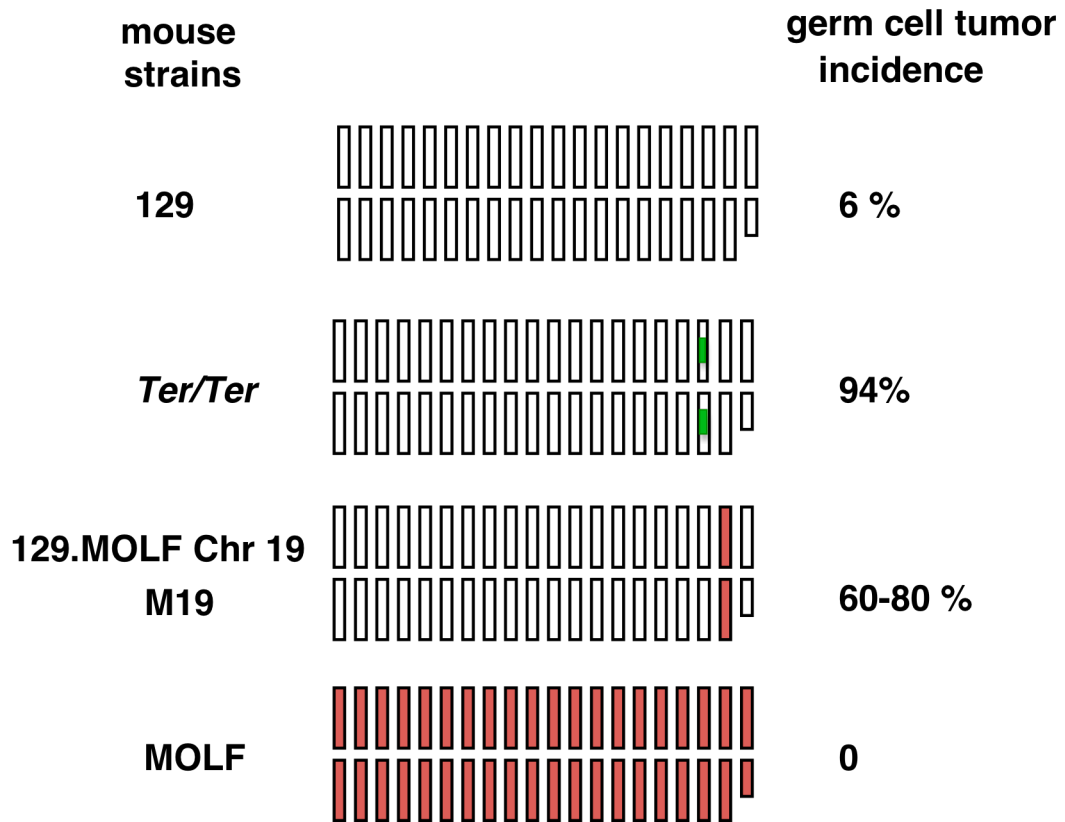

Supplement: NIHMS220401-supplement-3.pdf [file NIHMS220401-supplement-3.pdf]

Supplementary Figure 3

A

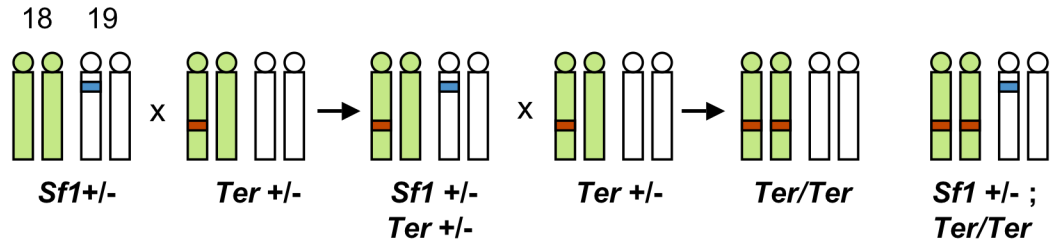

B

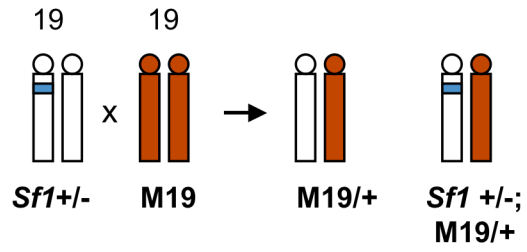

Supplement: NIHMS220401-supplement-4.pdf [file NIHMS220401-supplement-4.pdf]

Supplementary Figure 2

A

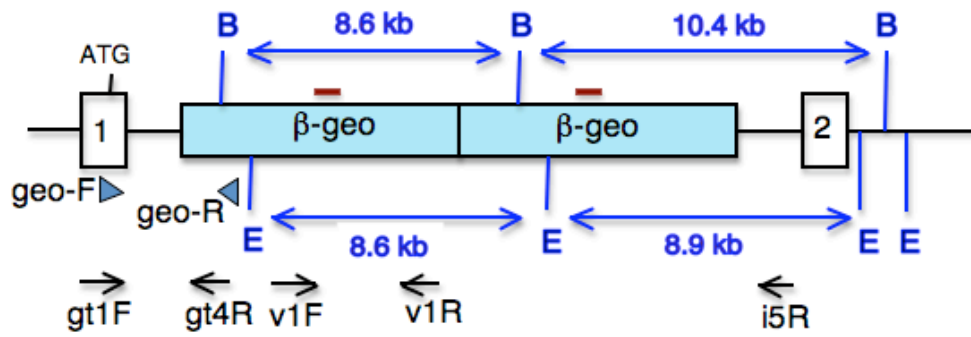

B

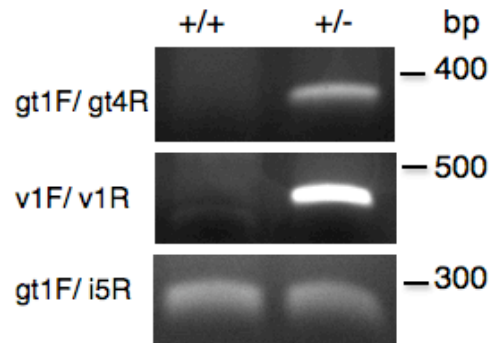

C

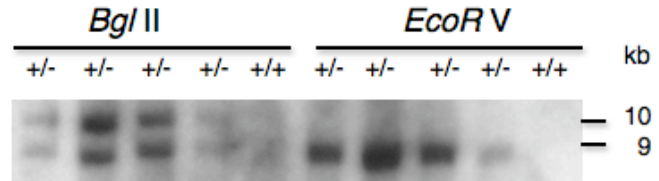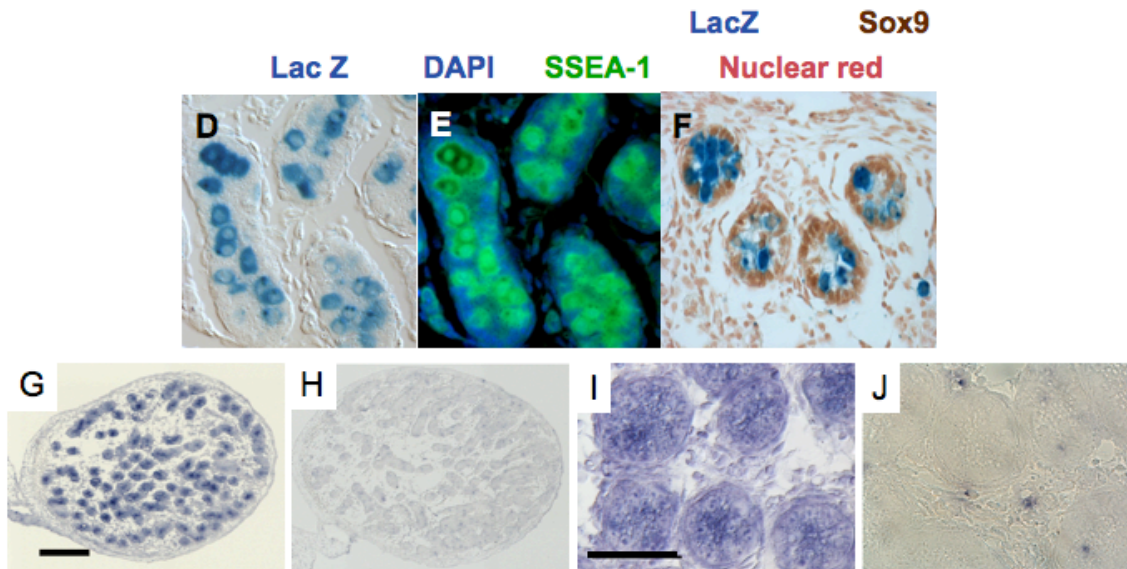

K

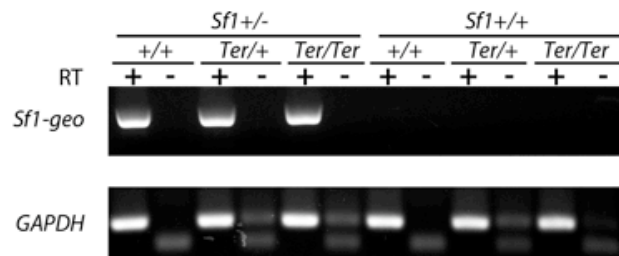

Supplement: NIHMS220401-supplement-5.pdf [file NIHMS220401-supplement-5.pdf]
